# Supplementary material
Source: PubMed Central journal article supplement (PMC2774060)
Supplement: ajpath.2009.090463_3.pdf [file ajpath.2009.090463_3.pdf]

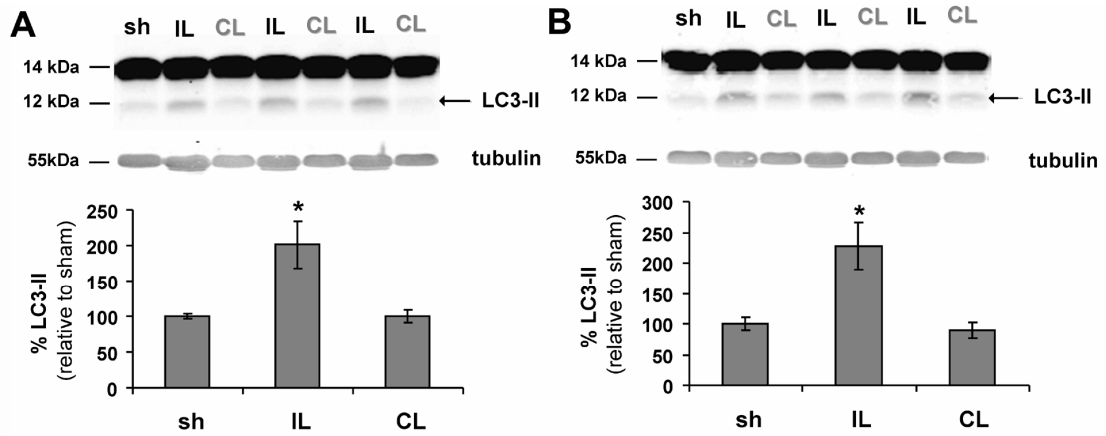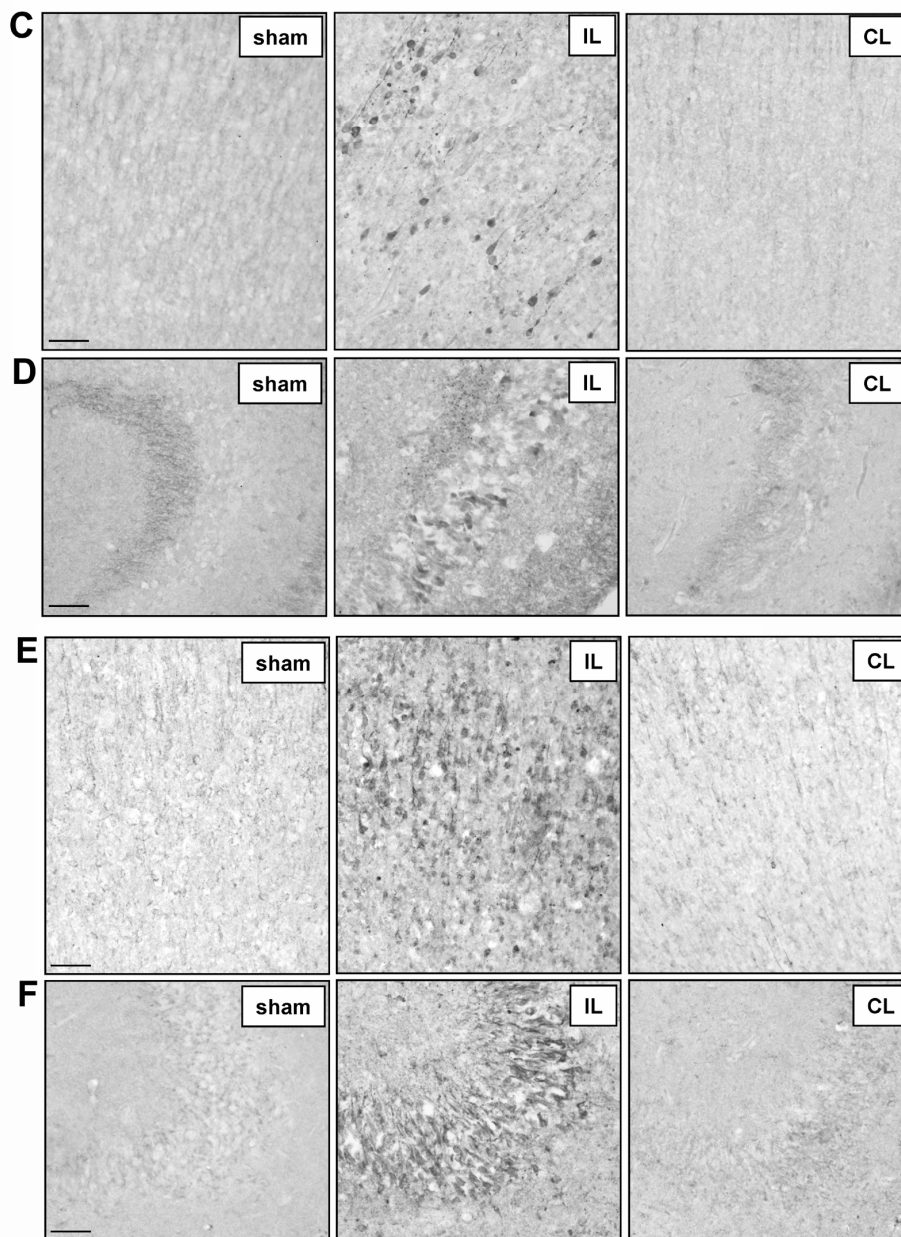

**Figure S3** Comparison of the effect of hypoxia-ischemia on ipsilateral (IL) and contralateral (CL) side. **A-B**: Representative Western blots (upper panel) against LC3 and the corresponding quantification (lower panel) of the LC3-II band showed that hypoxia-ischemia induced an increase in the IL cortex (**A**) and hippocampus (**B**) whereas there is no significant effect in the CL side 24h after hypoxia-ischemia. Data represents mean $\pm$ SEM. Comparisons with sham by t-test: \* $p$ <0.05;  $n$ =5. sh=sham. **C-D**: Immunohistochemistry showed that an increase in LC3 (**C,D**) or LAMP1 (**E,F**) staining occurred only in the IL cortex (**C,E**) and CA3 (**D,F**) whereas the CL side is not affected 24h after hypoxia-ischemia. Bar: 50 $\mu$ m.
